# Supplementary material for: Giant optical anisotropy in transition metal dichalcogenides for next-generation photonics
Source: PubMed Central journal article supplement (PMC7870936; doi:10.1038/s41467-021-21139-x), 2021-02-08
Supplement: 41467_2021_21139_MOESM1_ESM.pdf [file 41467_2021_21139_MOESM1_ESM.pdf]

## Supplementary Information

### Giant optical anisotropy in transition metal dichalcogenides for the next-generation photonics

*G.A. Ermolaev<sup>1,2</sup>, D.V. Grudinin<sup>1</sup>, Y.V. Stebunov<sup>3</sup>, K.V. Voronin<sup>1,2</sup>, V.G. Kravets<sup>4</sup>, J. Duan<sup>5,6</sup>,  
A.B. Mazitov<sup>1,7</sup>, G.I. Tselikov<sup>1</sup>, A. Bylinkin<sup>1,8</sup>, D.I. Yakubovsky<sup>1</sup>, S.M. Novikov<sup>1</sup>, D.G. Baranov<sup>1,9</sup>,  
A.Y. Nikitin<sup>10,11,1</sup>, I.A. Kruglov<sup>1,7</sup>, T. Shegai<sup>9</sup>, P. Alonso-González<sup>5,6</sup>, A.N. Grigorenko<sup>4</sup>, A.V.  
Arsenin<sup>1,12</sup>, K.S. Novoselov<sup>13,3,14</sup>, V.S. Volkov<sup>1,12\*</sup>*

<sup>1</sup>Center for Photonics and 2D Materials, Moscow Institute of Physics and Technology, Dolgoprudny 141700, Russia.

<sup>2</sup>Skolkovo Institute of Science and Technology, Moscow 121205, Russia.

<sup>3</sup>National Graphene Institute (NGI), University of Manchester, Manchester M13 9PL, UK.

<sup>4</sup>Department of Physics and Astronomy, University of Manchester, Manchester M13 9PL, UK.

<sup>5</sup>Department of Physics, University of Oviedo, Oviedo 33006, Spain.

<sup>6</sup>Center of Research on Nanomaterials and Nanotechnology, CINN (CSIC-Universidad de Oviedo), El Entrego 33940, Spain.

<sup>7</sup>Dukhov Research Institute of Automatics (VNIIA), Moscow 127055, Russia.

<sup>8</sup>CIC nanoGUNE BRTA, Donostia-San Sebastián 20018, Spain.

<sup>9</sup>Department of Physics, Chalmers University of Technology, Göteborg 412 96, Sweden.

<sup>10</sup>Donostia International Physics Center (DIPC), Donostia-San Sebastián 20018, Spain.

<sup>11</sup>IKERBASQUE, Basque Foundation for Science, Bilbao 48013, Spain.

<sup>12</sup>GrapheneTek, Skolkovo Innovation Center, Moscow 143026, Russia.

<sup>13</sup>Department of Materials Science and Engineering, National University of Singapore, Singapore 117574, Singapore.

<sup>14</sup>Chongqing 2D Materials Institute, Liangjiang New Area, Chongqing 400714, China.

\*e-mail: [volkov.vs@mipt.ru](mailto:volkov.vs@mipt.ru)

## 27 **Supplementary Note 1: Crystal characterization of 2H-MoS<sub>2</sub>**

28 Bulk MoS<sub>2</sub> is found to exist in three polymorphic states (different stacking sequences of  
29 monolayers with the same structure) shown in Supplementary Figure 1: 1T (tetragonal), 2H  
30 (hexagonal), and 3R (rhombohedral) with the integer referring to the number of layers in the unit  
31 cell. To verify our sample's crystal structure, we performed Raman spectroscopy at 532 and 632.8  
32 nm with x-ray diffraction characterization shown in Supplementary Figure 2. Raman spectra  
33 allows easily to distinguish 1T-phase since it has fundamental modes  $E_{1g} = 292 \text{ cm}^{-1}$  and  $A_{1g} =$   
34  $402 \text{ cm}^{-1}$ ,<sup>1</sup> whereas their positions  $E_{1g} = 383 \text{ cm}^{-1}$  and  $A_{1g} = 408 \text{ cm}^{-1}$  for 2H- and 3R-states are the  
35 same owing to their similar in-plane atoms arrangement.<sup>2</sup> Luckily, Lee and co-workers thoroughly  
36 analyzed Raman spectra for these phases.<sup>3</sup> They proved that the presence of 3R-phase in 2H-  
37 configuration is accompanied by the significant magnification of intensities for *a*- and *b*-peaks at  
38  $\lambda_{\text{exc}} = 632.8 \text{ nm}$  (see Supplementary Figure 2a-b), which is absent in our case. Thus, it validates  
39 2H-MoS<sub>2</sub> purity of the samples. As an additional verification, we performed x-ray diffraction  
40 (XRD) analysis and unambiguously checked the crystal structure because 2H- and 3R-  
41 configurations result in different diffraction<sup>4,5</sup> patterns shown in Supplementary Figure 2b. Apart  
42 from crystal structure, XRD also provides information about crystallographic parameters, which  
43 in our case  $a = b = 0.310 \pm 0.005 \text{ nm}$  and  $c = 1.229 \pm 0.001 \text{ nm}$ .

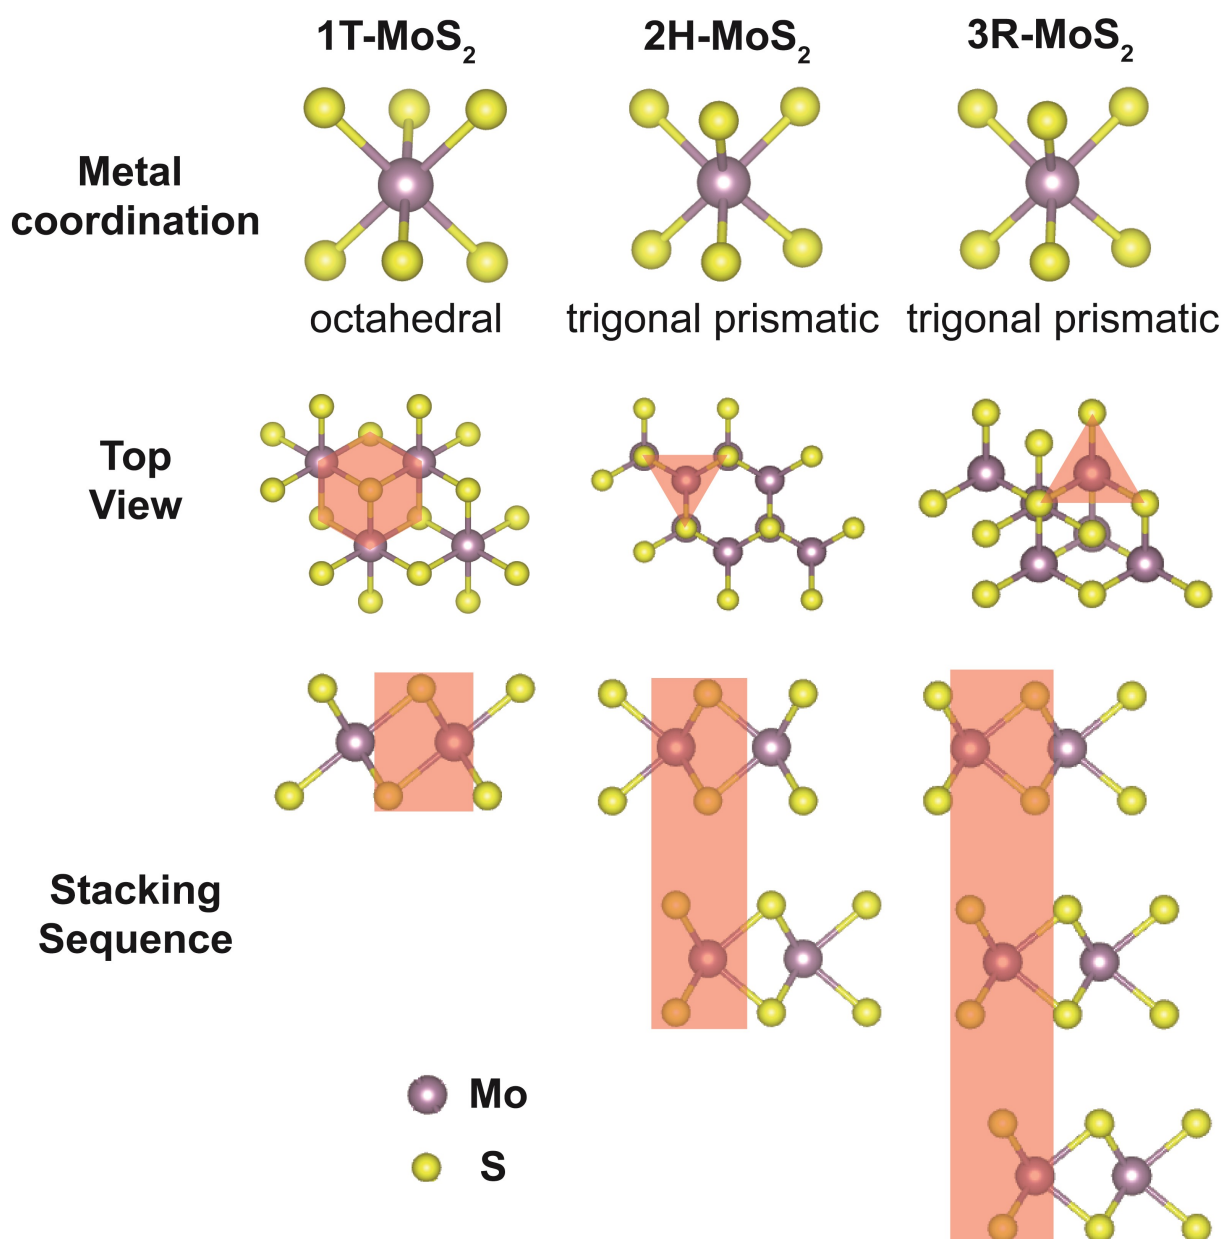

44

45 **Supplementary Figure 1.** Crystal structure of the MoS<sub>2</sub> polytypes: 1T-, 2H-, and 3R-  
 46 configurations. The red boxes denote the unit cell.

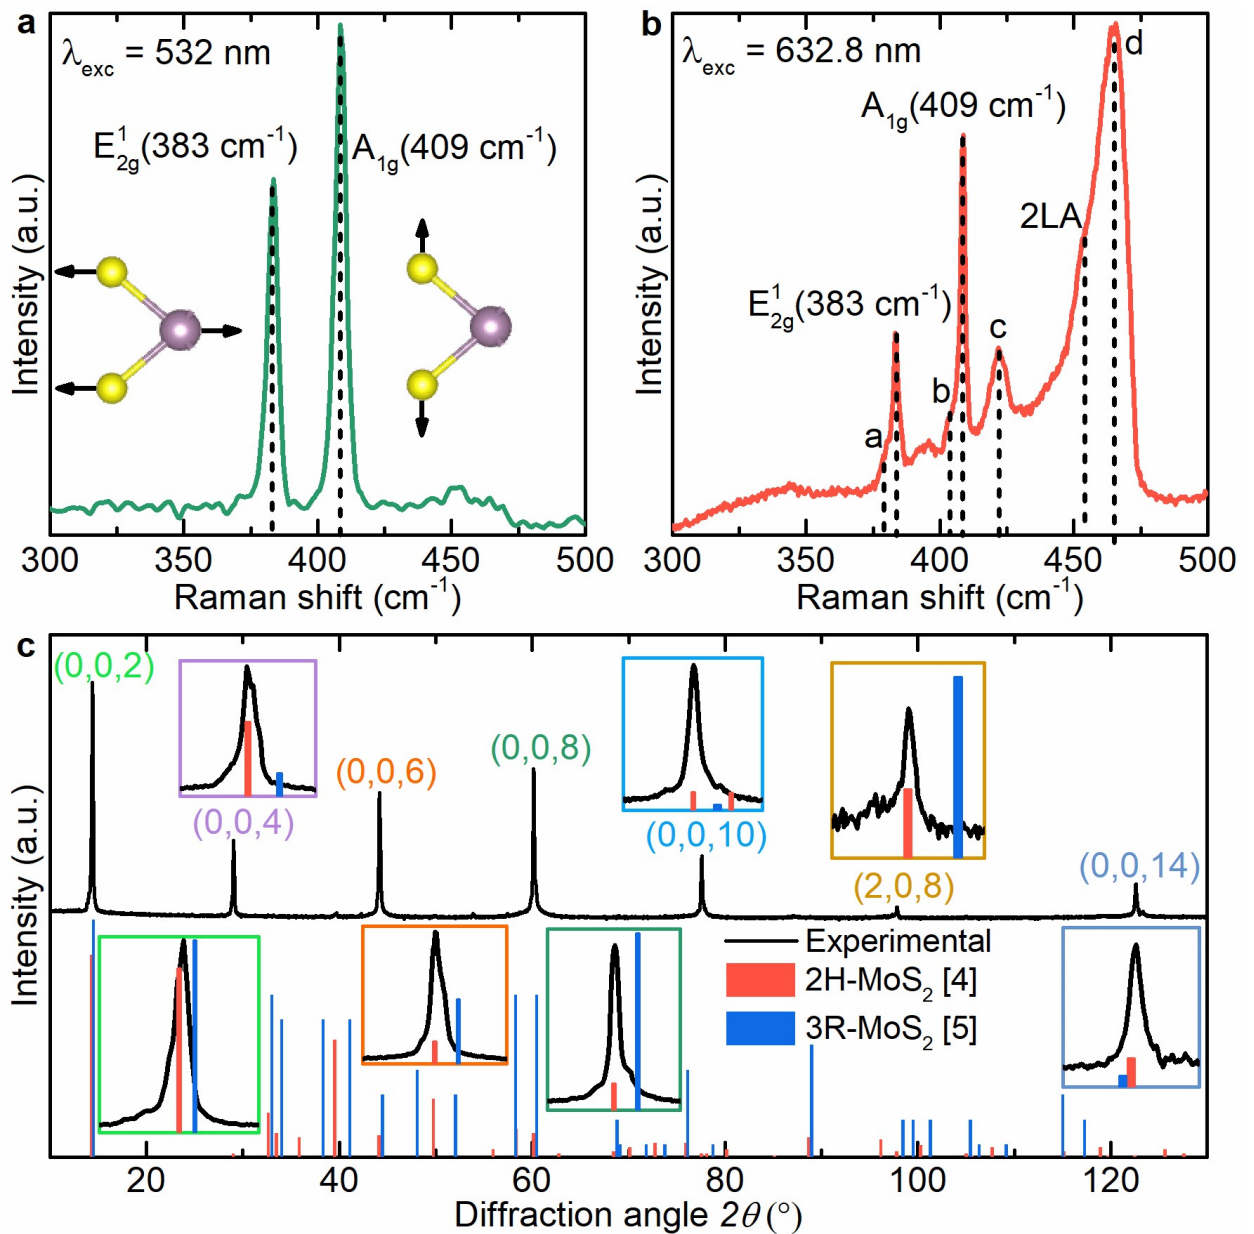

47

48 **Supplementary Figure 2. Crystal characterization.** Raman spectra in **a** non-resonant (excitation  
 49 wavelength does not induce exciton) and **b** resonant (excitation wavelength induces exciton)  
 50 conditions. The positions of two first-order Raman modes, namely  $E_{2g}^1$  and  $A_{1g}$ , correspond to  
 51 2H-MoS<sub>2</sub>. **c** X-ray measurements (using Cu-K $\alpha$  radiation ( $\lambda = 0.1542 \text{ nm}$ )) allows to distinguish  
 52 2H- from 3R-configuration<sup>4,5</sup> of MoS<sub>2</sub>. The insets in (c) shows the magnified diffraction orders.

53

## 54 **Supplementary Note 2: Ellipsometry measurements and analysis**

55 We characterize the far-field optical response of MoS<sub>2</sub> through imaging spectroscopic  
56 ellipsometry,<sup>6</sup> which configuration is schematically shown in Supplementary Figure 3. The major  
57 advantage of imaging over conventional ellipsometry is multiple samples measurements within  
58 the same field of view, as illustrated in Figure 1b. As a result, we have multiple spectra in  
59 Supplementary Figure 4 for the same system MoS<sub>2</sub>/SiO<sub>2</sub>/Si, but with different thicknesses (104  
60 and 126 nm). Therefore, we model them simultaneously with equal dielectric permittivities. Such  
61 an approach gives the most accurate results since it increases data reliability and reduces the  
62 correlation between fitting parameters. At the same time, to adequately describe optical constants,  
63 it is imperative to obtain a good initial guess for refractive indices for software to find the right  
64 answer and a physical model. To overcome the first problem we proceeded in the following way:  
65 in the transparent range (800 – 1700 nm) both in-plane and out-of-plane components were  
66 described by a Cauchy model  $A + B/\lambda^2$ , then we performed Kramers-Kronig consistent B-spline  
67 expansion<sup>7</sup> for the whole spectral interval (360 – 1700 nm) for in-plane dielectric permittivity.  
68 Later we leveraged the Tauc-Lorentz oscillator model to describe in-plane dielectric response by  
69 fitting the B-spline result.<sup>8</sup>

70 **Supplementary Equation 1.** Tauc-Lorentz oscillator.

$$71 \quad \varepsilon_2 = \begin{cases} \frac{1}{E} \cdot \frac{AE_0C(E-E_g)^2}{(E^2-E_0^2)^2+C^2E^2} & \text{for } E > E_g, \\ 0 & \text{for } E < E_g \end{cases},$$

72 where  $E$  is the photon energy,  $A$  is the strength of the oscillator,  $C$  is the broadening term,  $E_g$  is the  
73 optical band gap, and  $E_0$  is the peak central energy with the real part of dielectric function derived  
74 from the expression of  $\varepsilon_2$  using Kramers-Kronig integration. Finally, we fitted the spectra in  
75 Supplementary Figure 4 by varying the parameters of the Tauc-Lorentz oscillators and Cauchy  
76 model with the results collected in Supplementary Table 1.

77

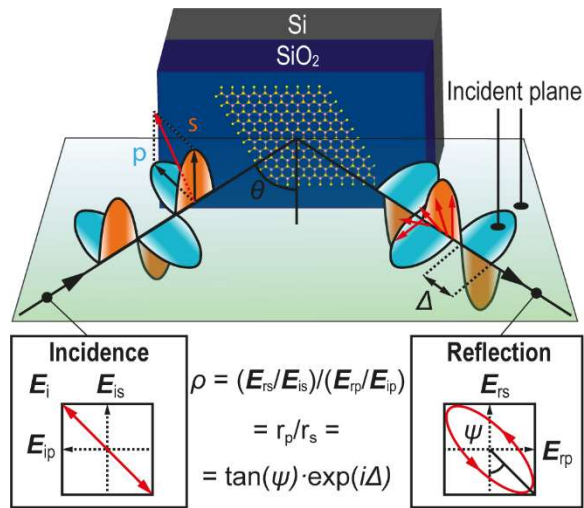

78

79 **Supplementary Figure 3.** The scheme of spectroscopic ellipsometry measurements.

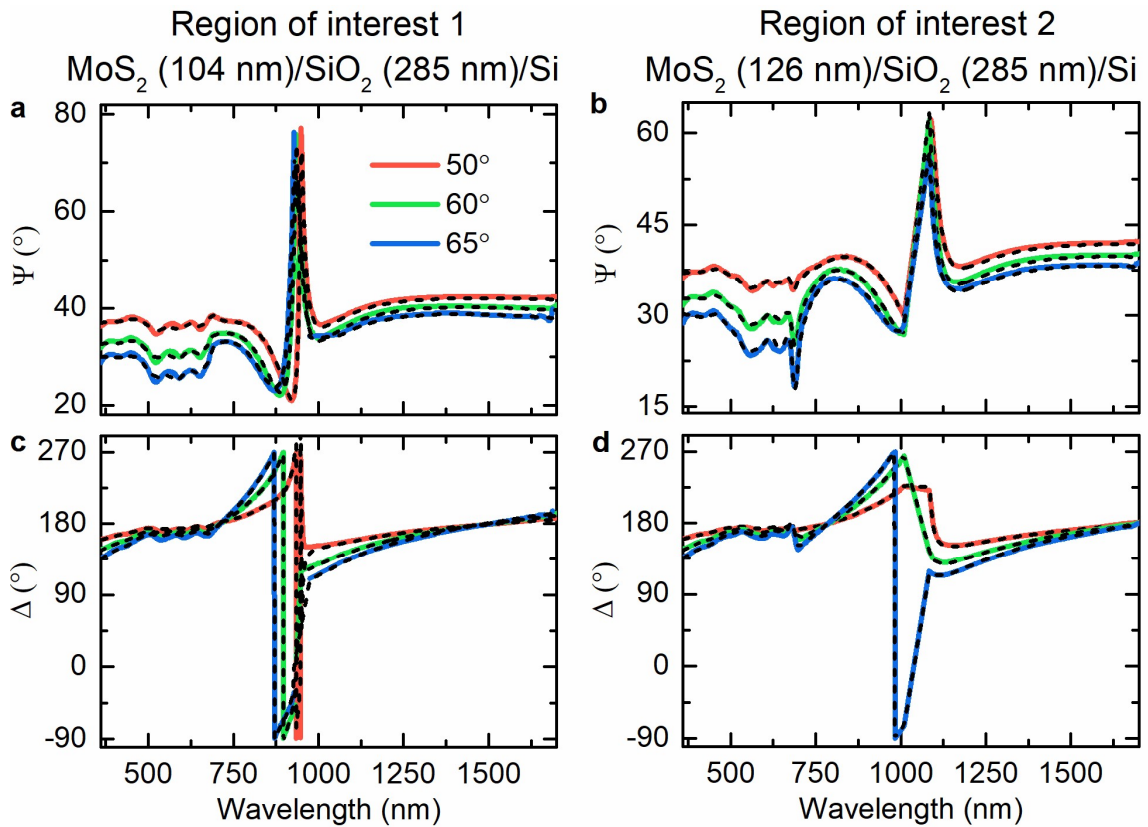

80

81 **Supplementary Figure 4. a-d** Experimentally measured (solid lines) and calculated by Fresnel  
 82 Formulas<sup>9</sup> (dashed lines) for regions of interest (ROIs) 1 and 2 (shown in Figure 1b) ellipsometric  
 83 parameters  $\Psi$  and  $\Delta$  for the system MoS<sub>2</sub>/SiO<sub>2</sub>/Si at three incident angles (50°, 60°, and 65°). The  
 84 asymmetrical interference-like peak at around 900 nm for ROI 1 and around 1100 nm for ROI 2  
 85 is induced by interference enhancement in SiO<sub>2</sub> caused by splitting the incident beam into ordinary

86 and extraordinary rays. This prominent asymmetry for  $\Psi$  stems from giant anisotropy between the  
87  $c$ -axis and  $ab$ -plane.

88 In general, the fitting procedure described above could be summarized in 3 steps, which could be  
89 successfully applied to similar TMDCs such as MoSe<sub>2</sub>, WSe<sub>2</sub>, WS<sub>2</sub>, and MoTe<sub>2</sub> in 2H-  
90 configuration. Note that we include in the physical model finite coherence of the light source  
91 (bandwidth equals 5 nm for 360 – 1000 nm and 15 nm for 1000 – 1700 nm) to include the device  
92 nonidealities:

93 **Step 1 (Transparent fitting region):** In the transparent range (800 – 1700 nm), both in-plane and  
94 out-of-plane components were described by a Cauchy model  $A + B/\lambda^2$ . The fitting of  $\Psi$  and  $\Delta$  by  
95 Levenberg–Marquardt algorithm results in optical constants presented in Supplementary Figure 5:

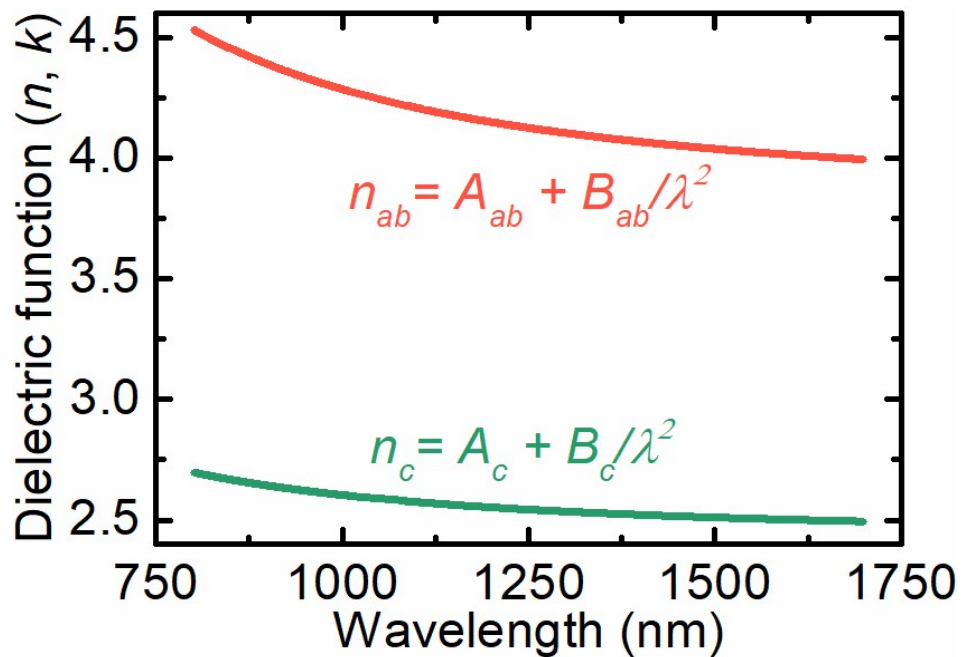

96

97 **Supplementary Figure 5.** Optical constants of MoS<sub>2</sub> along the  $ab$ -plane and  $c$ -axis after step 1  
98 with Cauchy parameters  $A_{ab} = 3.84$ ,  $B_{ab} = 0.44 \mu\text{m}^2$ ,  $A_c = 2.44$ ,  $B_c = 0.17 \mu\text{m}^2$ .

99 **Step 2 (Wavelength expansion):** Next, the  $ab$ -plane dielectric function is approximated by  
100 Kramers-Kronig B-splines<sup>7</sup> placed equidistantly in the considered wavelength range with the step

101 of 0.05 eV, with subsequent expansion of the optical constants fitting to the whole wavelength  
102 interval (360 – 1700 nm) by the method described in the work of Mohrmann and et al.<sup>7</sup>:

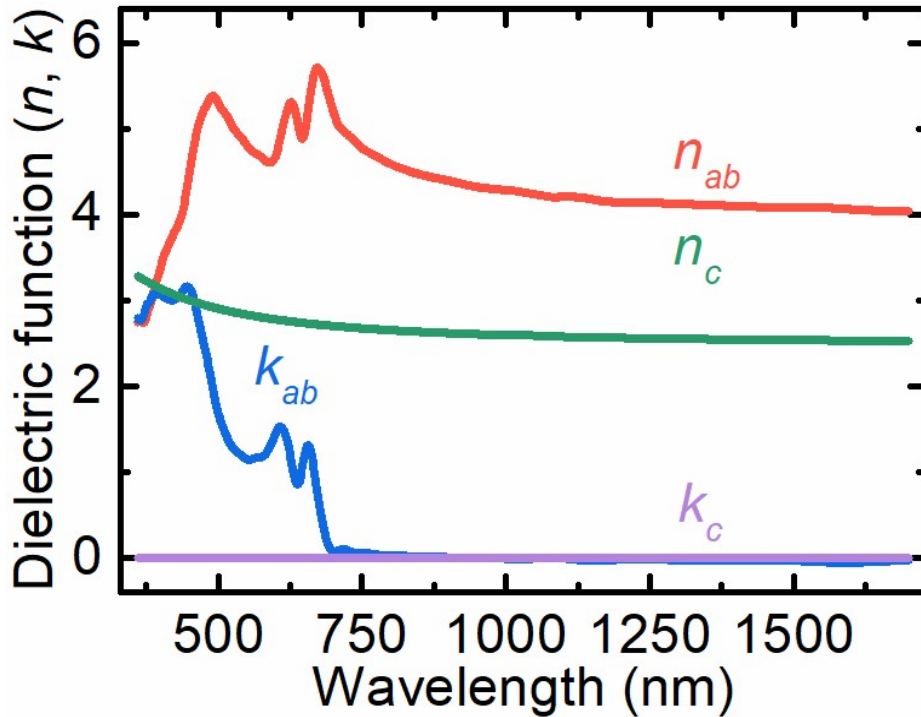

103

104 **Supplementary Figure 6.** Optical constants of MoS<sub>2</sub> along the *ab*-plane (B-splines) and *c*-axis  
105 (Cauchy function) after step 2.

106 **Step 3 (Tauc-Lorentz description):** Although the previous step already gives decent results, it is  
107 worth describing optical constants using the material properties since the B-spline approach tends  
108 to provide unphysical optical constants.<sup>7</sup> In the case of TMDCs, the best dielectric function for  
109 describing their dielectric function is the Tauc-Lorentz oscillator model.<sup>8</sup> It also allows for  
110 obtaining more accurate values (Figure 2a) because of the reduction number of the fitting  
111 parameters (from 57 to 21) with the best values collected in Supplementary Table 1.

112 **Supplementary Table 1.** Tauc-Lorentz parameters of the oscillators (excitons) describing the in-  
113 plane dielectric response of MoS<sub>2</sub> with  $\epsilon_\infty = 5.26 \pm 0.19$  and ultraviolet pole (unbroadened  
114 oscillator) placed at 15 eV with amplitude equals to  $228 \pm 8$  that affects the real part of the optical  
115 constants by accounting for a strong absorption outside the measured spectrum. In contrast, the



116 resulting Cauchy model for the out-of-plane component has  $A = 2.463 \pm 0.009$  and  $B = (119 \pm$   
 117  $9) \cdot 10^3 \text{ nm}^2$ .

| Oscillator      | $A$<br>eV      | $E_0$<br>eV       | $C$<br>meV    | $E_g$<br>eV       |
|-----------------|----------------|-------------------|---------------|-------------------|
| #1 (A-exciton)  | $308 \pm 6$    | $1.852 \pm 0.002$ | $67 \pm 5$    | $1.761 \pm 0.009$ |
| #2 (B-exciton)  | $135 \pm 5$    | $2.006 \pm 0.006$ | $148 \pm 14$  | $1.82 \pm 0.03$   |
| #3 (C-exciton)  | $19.3 \pm 0.5$ | $2.662 \pm 0.005$ | $380 \pm 27$  | $1.24 \pm 0.12$   |
| #4 (C'-exciton) | $69 \pm 7$     | $2.99 \pm 0.03$   | $1348 \pm 39$ | $1.31 \pm 0.03$   |

118

119 **Supplementary Note 3: Interference enhancement for anisotropic optical constants**  
120 **determination**

121 Identification of anisotropic properties of high index semiconductors by traditional techniques  
122 such as reflectance, transmission, and ellipsometry is a tedious task owing to the low sensitivity of  
123 the signal to the out-of-plane permitting to a determination of only in-plane dielectric response.<sup>10</sup>  
124 To overcome this obstacle, we used interference enhancement method. In the approach, the sample  
125 of interest is placed on SiO<sub>2</sub>/Si wafer. The SiO<sub>2</sub> layer accomplishes two functions. First of all, it  
126 increases sensitivity to the p- and s-polarization reflection at the interface MoS<sub>2</sub>/SiO<sub>2</sub> due to their  
127 large difference in their refractive indices ( $n_{ab} \sim 4$  and  $n_c \sim 2.5$  for MoS<sub>2</sub> and  $n \sim 1.4$  for SiO<sub>2</sub>).  
128 Secondly, oxide produces interference peaks (at 950 and 1090 nm in Figure S2a-b), which depends  
129 on MoS<sub>2</sub> and SiO<sub>2</sub> thicknesses, allowing to implement Step 1 of the fitting procedure because of  
130 the major difference between isotropic and anisotropic treatment in the peak vicinity as illustrated  
131 in Supplementary Figure 7.

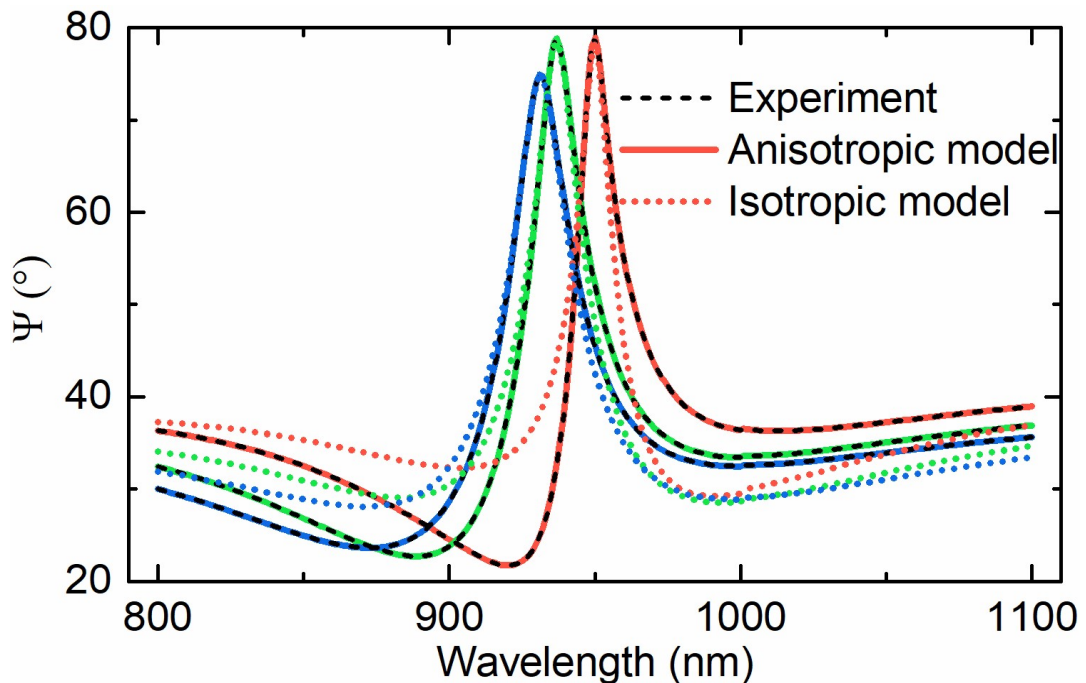

132

133 **Supplementary Figure 7.** Interference peak caused by the SiO<sub>2</sub> layer in MoS<sub>2</sub> (104 nm)/SiO<sub>2</sub> (285  
134 nm)/Si system. The giant anisotropy in MoS<sub>2</sub> transforms almost symmetrical peak into  
135 asymmetrical.

136 **Supplementary Note 4: Dielectric permittivity of MoS<sub>2</sub> from first principles**

137 The comparison of the experimental data with first-principle calculations (see Methods) is  
138 presented in Supplementary Figure 8. Our experimental results qualitatively and in the infrared  
139 region, even quantitatively agree with the first-principles calculations, which further validate our  
140 findings. The small mismatch is likely attributed to the approximations used in DFT analysis since  
141 near-field measurements reproduced our dielectric function at 1470 – 1570 and 632.8 nm in the  
142 main text. Surprisingly, the in-plane component of the dielectric permittivity tensor is better  
143 described by the microscopic dielectric function, whereas the out-of-plane component is better  
144 described by the macroscopic dielectric function (for the rigorous definitions of micro- and  
145 macroscopic dielectric response see the book of Bechstedt<sup>11</sup>). Clearly, our findings indicate that  
146 for layered materials, the physical origins for the spectral behavior of the in-plane and out-of-plane  
147 components of the dielectric permittivity tensor are different and cannot be treated in the same  
148 way. To date, the authors believe that this phenomenon stems from the similarity of *ab*-plane to  
149 monolayer structure, where the local effects (microscopic) play a significant role in optical  
150 response. Still, further studies are needed to clarify the observed effect, which is fundamental for  
151 *ab initio* study of the layered materials.

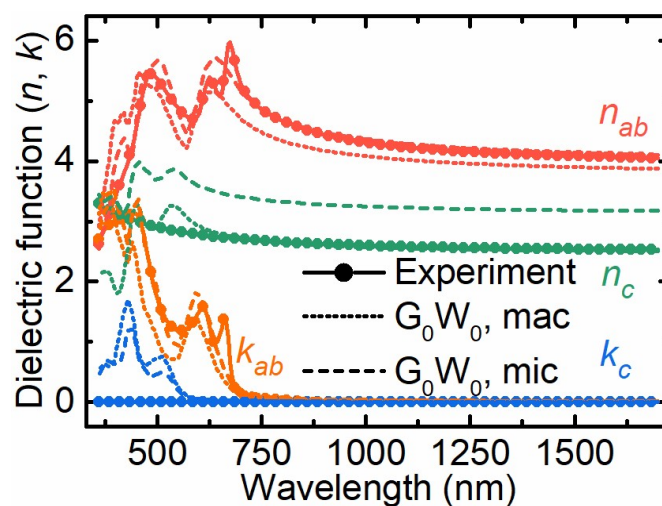

152

153 **Supplementary Figure 8.** Comparison between experimental and DFT predicted macroscopic  
154 (mac) and microscopic (mic) optical constants along the crystallographic *ab*-plane and *c*-axis.

155 **Supplementary Note 5: Near-field imaging of a planar waveguide mode within MoS<sub>2</sub> flake**  
156 **and extreme skin depth in silicon**

157 To analyze the planar waveguide modes in MoS<sub>2</sub> flake and silicon waveguide on MoS<sub>2</sub> with  
158 extreme skin-depth at multiple wavelengths, we performed scattering-type near-field optical  
159 microscopy (s-SNOM), which scheme is presented in Supplementary Figure 9. The resulting  
160 signals are an oscillation of light intensity induced by the tip and edge-scattered photons, as clearly  
161 seen in Supplementary Figures 10-12. To analyze the effective mode index, we carried out the  
162 complex Fourier transformation (FT). Unlike the widely used real FT, it takes into account the real  
163 and imaginary signals at the same time and thus more precise, as could be understood from  
164 Supplementary Figure 13. Furthermore, it provides additional information about the predominant  
165 scattering mechanism. Mainly, there are no peaks for the negative values of  $q$  in Supplementary  
166 Figures 10-12c, indicating that no modes propagate in the backward direction (from the edge to  
167 the tip).

168 Besides, it is worth to discuss the absence of TM<sub>3</sub>, TM<sub>2</sub>, and TM<sub>0</sub> modes at  $\lambda = 632.8$  nm in the  
169 measured signal in Supplementary Figure 13a. The first two TM<sub>3</sub> and TM<sub>2</sub> could not propagate  
170 because their figure of merit or, in other words, the possible number of observed fringes, is less  
171 than unity; while the coupling efficiency  $f$  with an s-SNOM tip for TM<sub>0</sub> ( $f = 0.016$ ) is much lower  
172 than for TM<sub>1</sub> ( $f = 0.043$ ) as demonstrated in Supplementary Figure 14, thus explaining the  
173 predominant behavior of TM<sub>1</sub> in the measured signal in Supplementary Figure 11.

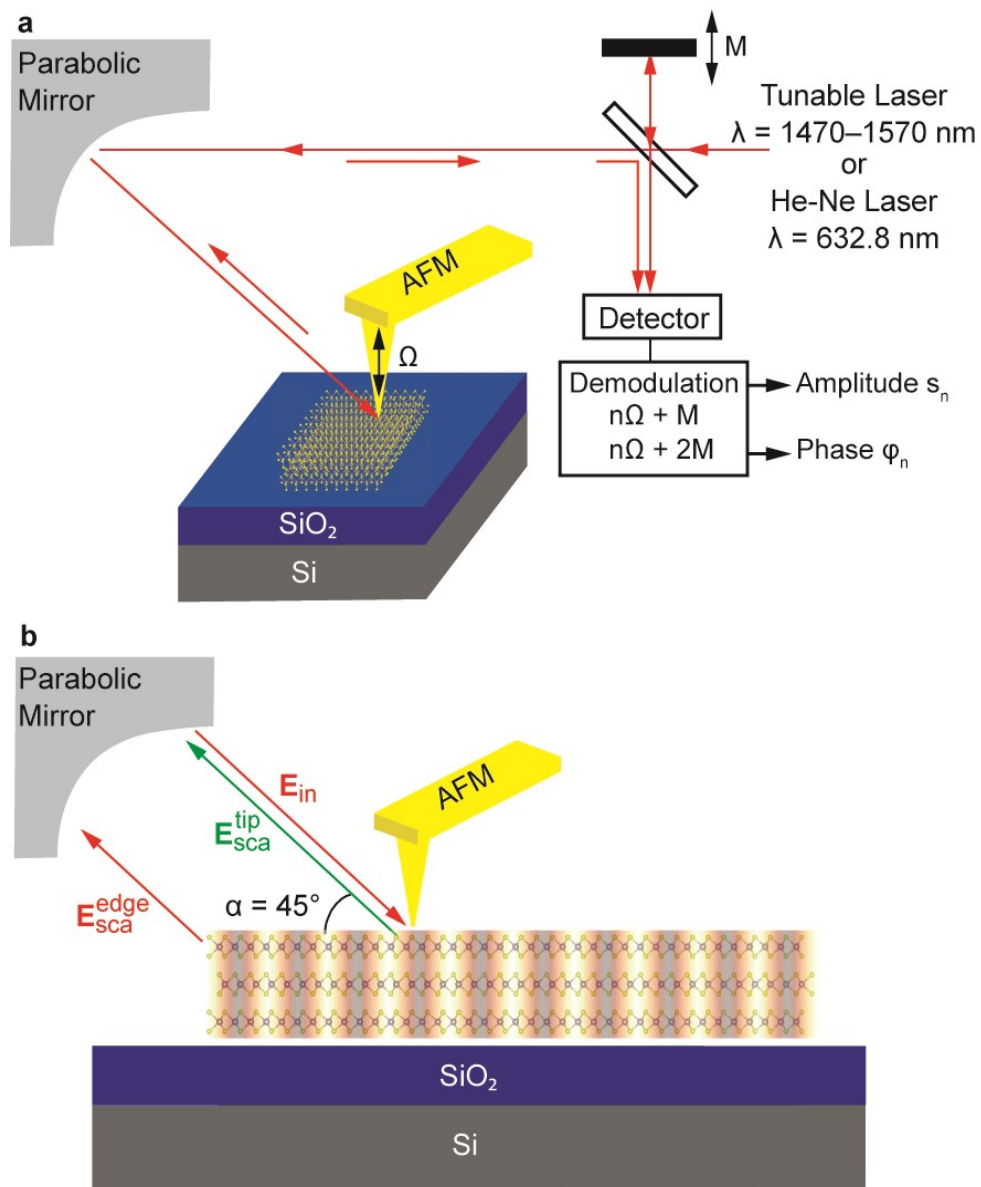

174

175 **Supplementary Figure 9. a** Schematic of the s-SNOM experimental configuration used to image  
 176  $\text{MoS}_2$  flake. A metalized AFM tip is illuminated by p-polarized light of wavelength  $\lambda$ . It launches  
 177 a planar waveguide mode, which interferes with the illuminating plane wave and gets scattered at  
 178 the sample edge to the far-field, where a distant detector collects it. **b** Illustration of waveguide  
 179 mode tip excitation and following scattering at the flake's edge.

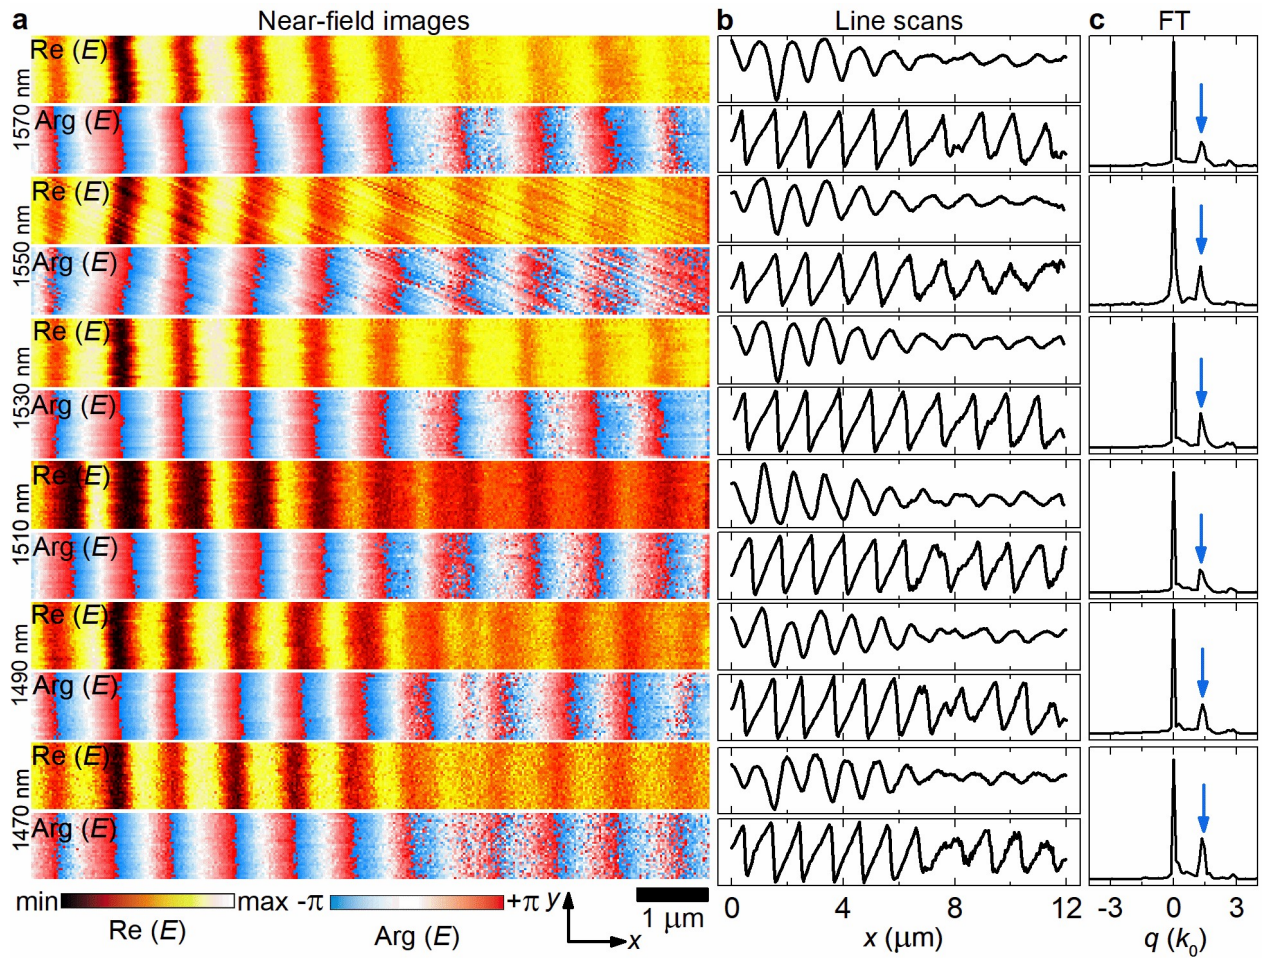

180

181 **Supplementary Figure 10. a** Near-field images, real part  $\text{Re}(E)$  and phase  $\text{Arg}(E)$ , of electric field  
 182  $E$  taken at 1570 – 1470 (from top to bottom) in an area of the image in Figure 3b, indicated by a  
 183 blue rectangular. **b**  $x$ -line scans taken from **(a)** and averaged over  $1.2\ \mu\text{m}$  along the  $y$ -axis. **c** Fourier  
 184 transform (FT) amplitude of the complex near-field signal in **(b)**, the blue arrow marks the peak  
 185 associated with waveguide mode.

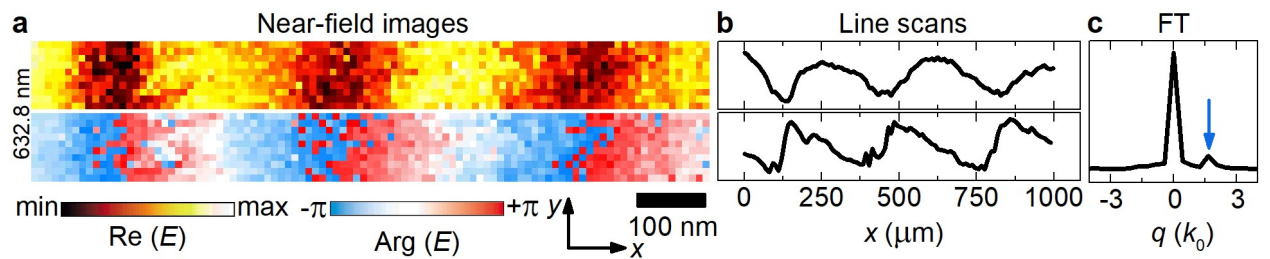

186

187 **Supplementary Figure 11. a** Near-field images, real part  $\text{Re}(E)$  and phase  $\text{Arg}(E)$ , of electric field  
 188  $E$  taken at 632.8 nm in an area of the image in Figure 3b, indicated by a blue rectangular. **b**  $x$ -line  
 189 scans taken from **(a)** and averaged over  $1.2\ \mu\text{m}$  along the  $y$ -axis. **c** Fourier transform (FT)

190 amplitude of the complex near-field signal in **(b)**, the blue arrow marks the peak associated with  
 191 waveguide mode.

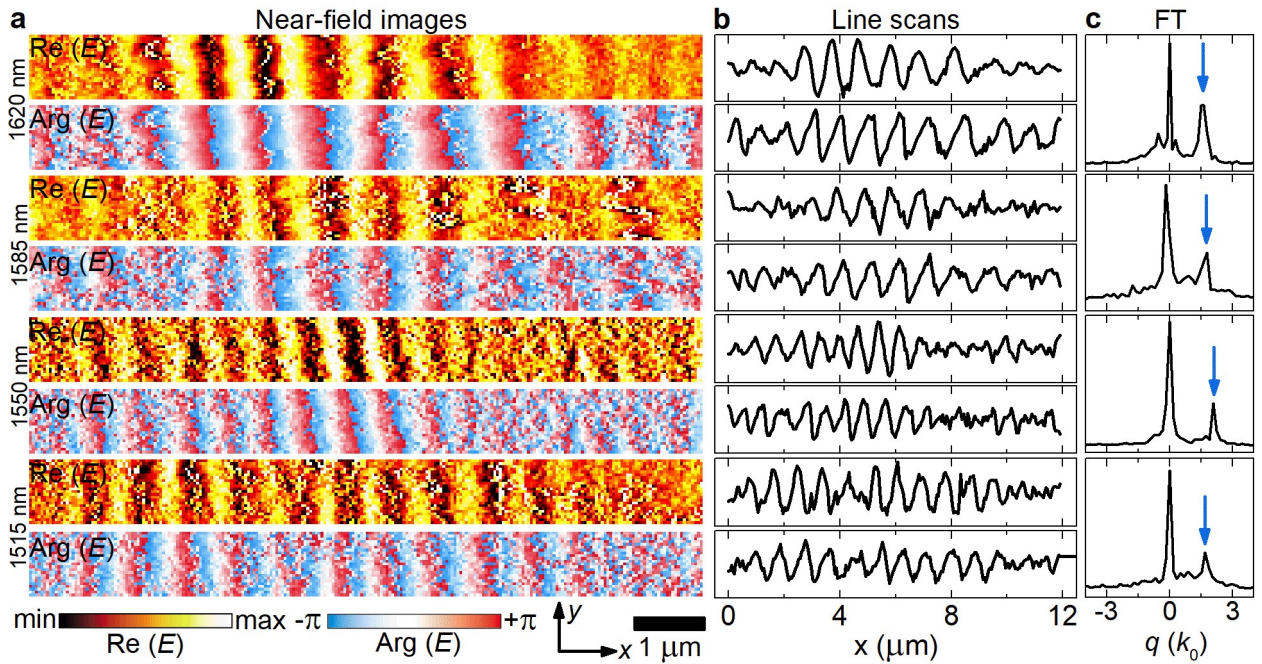

192  
 193 **Supplementary Figure 12.** **a** Near-field images, real part  $\text{Re}(E)$  and phase  $\text{Arg}(E)$ , of electric field  
 194  $E$  taken at 632.8 nm in an area of the image in Figure 5g-h, indicated by a green rectangular. **b**  $x$ -  
 195 line scans taken from **(a)** and averaged over 1.2  $\mu\text{m}$  along the  $y$ -axis. **c** Fourier transform (FT)  
 196 amplitude of the complex near-field signal in **(b)**, the blue arrow marks the peak associated with  
 197 waveguide mode.

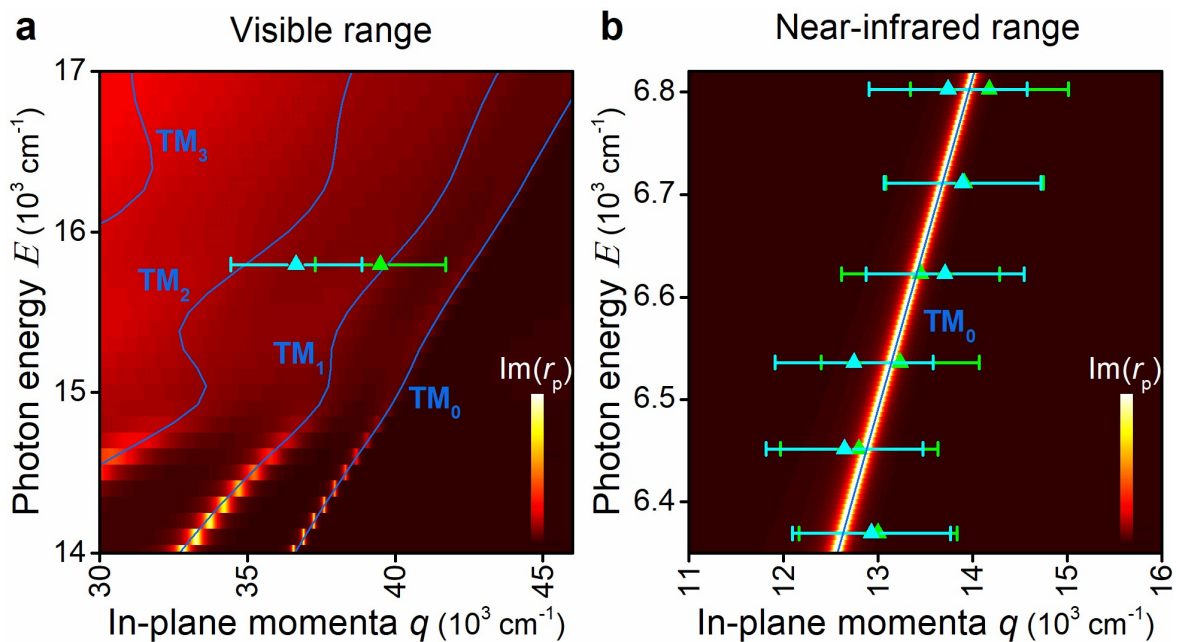

198

199 **Supplementary Figure 13.** Comparison of the different analyses of near-field signal with green  
 200 and cyan triangles corresponding to complex and real FT, respectively, for **a** visible and **b** near-  
 201 infrared wavelength ranges. Meanwhile, in the near-infrared interval, different approaches yield  
 202 the same result; for visible range, the difference is striking with complex FT, giving much better  
 203 agreement with the theory prediction.

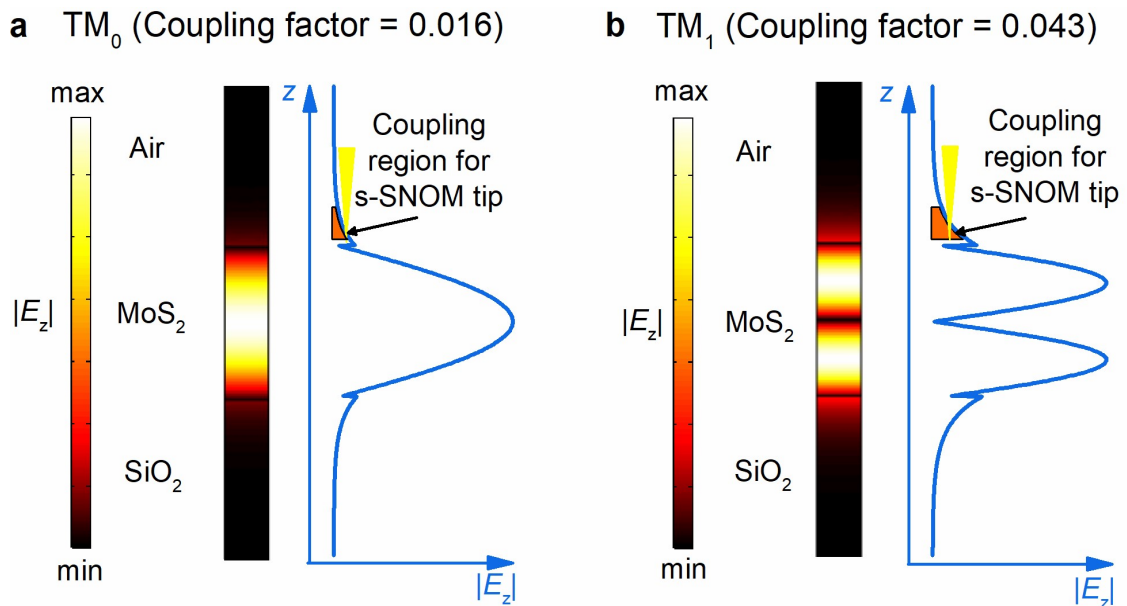

204

205 **Supplementary Figure 14.** Coupling efficiency comparison of waveguide near-field with s-  
 206 SNOM tip at  $\lambda = 632.8$  nm for **a**  $TM_0$  and **b**  $TM_1$  modes. Clearly, the coupling factor for  $TM_1$   
 207 (0.043) is much higher than for  $TM_0$  (0.016), thus explaining the predominant behavior in the  
 208 measured signal for  $TM_1$  in Supplementary Figure 13.

209

## 210 SUPPLEMENTARY REFERENCES

- 211 1. Fang, Y. *et al.* Structure Re-determination and Superconductivity Observation of Bulk 1T  
 212  $MoS_2$ . *Angew. Chemie* **130**, 1246–1249 (2018).
- 213 2. Placidi, M. *et al.* Multiwavelength excitation Raman scattering analysis of bulk and two-  
 214 dimensional  $MoS_2$ : Vibrational properties of atomically thin  $MoS_2$  layers. *2D Mater.* **2**,  
 215 35006 (2015).
- 216 3. Lee, J. U. *et al.* Raman Signatures of Polytypism in Molybdenum Disulfide. *ACS Nano* **10**,  
 217 1948–1953 (2016).
- 218 4. Mcmurdie, B. H. F. *et al.* Standard X-Ray Diffraction Powder Patterns from The JCPDS  
 219 Research Associateship — International Centre for Diffraction Data Ammonium Hydrogen  
 220 Phosphate,  $NH_4H_2PO_4$  Barium Magnesium Germanium Oxide, . *Powder Diffr.* **1**, 334–345



- 221 (1986).
- 222 5. Takeuchi, W. Nowacki, Detailed crystal structure of rhombohedral MoS<sub>2</sub> and systematic  
223 deduction of possible polytypes of molybdenite, *Schweizerische Mineral. Und Petrogr.*  
224 *Mitteilungen* **44**, 105–120 (1964).
- 225 6. Funke, S. *et al.* Imaging spectroscopic ellipsometry of MoS<sub>2</sub>. *J. Phys. Condens. Matter* **28**,  
226 385301 (2016).
- 227 7. Mohrmann, J., Tiwald, T. E., Hale, J. S., Hilfiker, J. N. & Martin, A. C. Application of a B-  
228 spline model dielectric function to infrared spectroscopic ellipsometry data analysis. *J. Vac.*  
229 *Sci. Technol. B* **38**, 014001 (2020).
- 230 8. Ermolaev, G. A., Yakubovsky, D. I., Stebunov, Y. V., Arsenin, A. V. & Volkov, V. S.  
231 Spectral ellipsometry of monolayer transition metal dichalcogenides: Analysis of excitonic  
232 peaks in dispersion. *J. Vac. Sci. Technol. B* **38**, 014002 (2020).
- 233 9. Hecht, E. *Optics* (Pearson, Harlow, 2016).
- 234 10. Ermolaev, G. A. *et al.* Broadband optical properties of monolayer and bulk MoS<sub>2</sub>. *npj 2D*  
235 *Mater. Appl.* **4**, 1–6 (2020).
- 236 11. Bechstedt, F. *Many-Body Approach to Electronic Excitations: Concepts and Applications*  
237 (Springer, Berlin, 2014).
- 238
